# Supplementary material for: Nitrogen and iron codoped porous carbon polyhedra for effectively confining polysulfides and efficiently catalyzing their conversion in lithium–sulfur batteries
Source: Royal Society of Chemistry journal article supplement (doi:10.1039/d0se00942c), 2020-01-01
Supplement: d0se00942c1.pdf [file d0se00942c1.pdf]

Electronic Supplementary Information

**Nitrogen and Iron Codoped Porous Carbon Polyhedrons for  
Effectively Confining Polysulfides and Efficiently Catalyzing  
Their Conversion in Lithium-Sulfur Batteries**

Jingping Yu<sup>a, b</sup> Shahzad Ahmad Khan,<sup>a</sup> Dengke Zhao<sup>a</sup>, Ligui Li,<sup>\*a, b, c</sup> Zexing Wu,<sup>d</sup>  
Xiaojun Niu,<sup>a, b</sup> and Shaowei Chen<sup>e</sup>

---

<sup>a</sup>*Guangzhou Key Laboratory for Surface Chemistry of Energy Materials, New Energy Research Institute, School of Environment and Energy, Guangzhou Higher Education Mega Center, South China University of Technology, Guangzhou 510006, China.*

<sup>b</sup>*Guangdong Provincial Key Laboratory of Petrochemical Pollution Process and Control, Guangdong University of Petrochemical Technology.*

<sup>c</sup>*Guangdong Provincial Key Laboratory of Advance Energy Storage Materials, South China University of Technology, Guangzhou, 510640, China.*

<sup>d</sup>*State Key Laboratory Base of Eco-chemical Engineering, College of Chemistry and Molecular Engineering, Qingdao University of Science & Technology, 53 Zhengzhou Road, 266042, Qingdao, China.*

<sup>e</sup>*Department of Chemistry and Biochemistry, University of California, 1156 High Street, Santa Cruz, California 95064, USA*

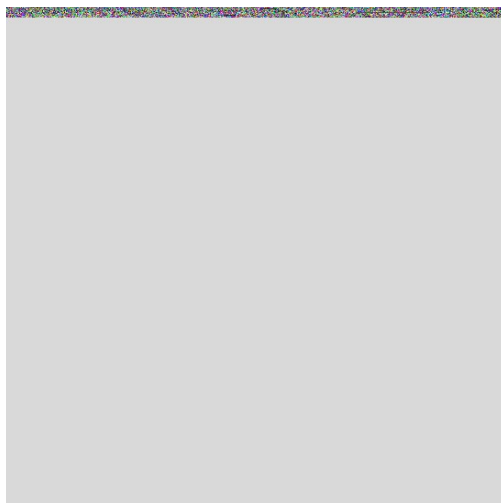

**Figure S1.** SEM image of ZIF-8.

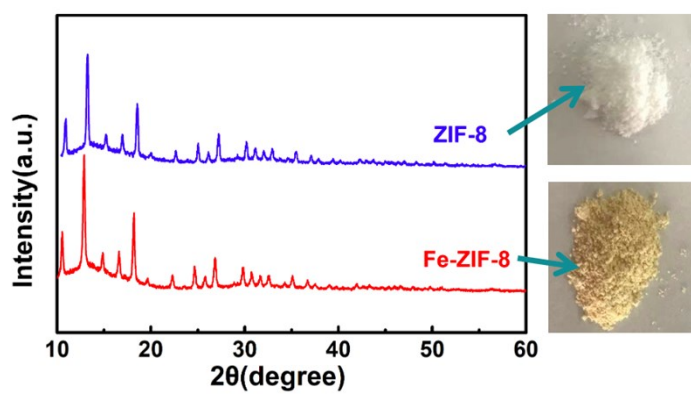

**Figure S2.** XRD patterns and images for Fe-ZIF-8 and ZIF-8 samples.

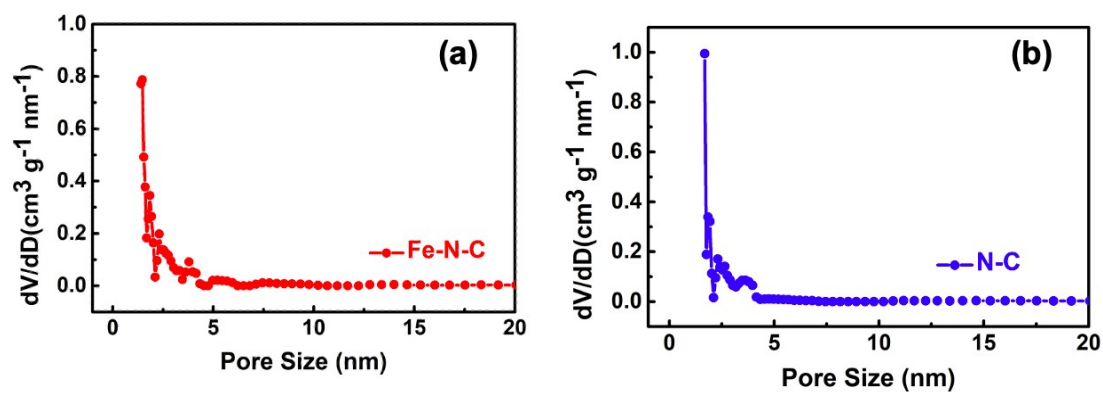

**Figure S3.** Pore size distribution plots for (a) Fe-N-C and (b) N-C samples.
